# Supplementary material for: Association of the past epidemic of Mycobacterium tuberculosis with mortality and incidence of COVID-19
Source: PubMed Central journal article supplement (PMC8213125; doi:10.1371/journal.pone.0253169), 2021-06-18
Supplement: pone.0253169.s002.pdf [file pone.0253169.s002.pdf]

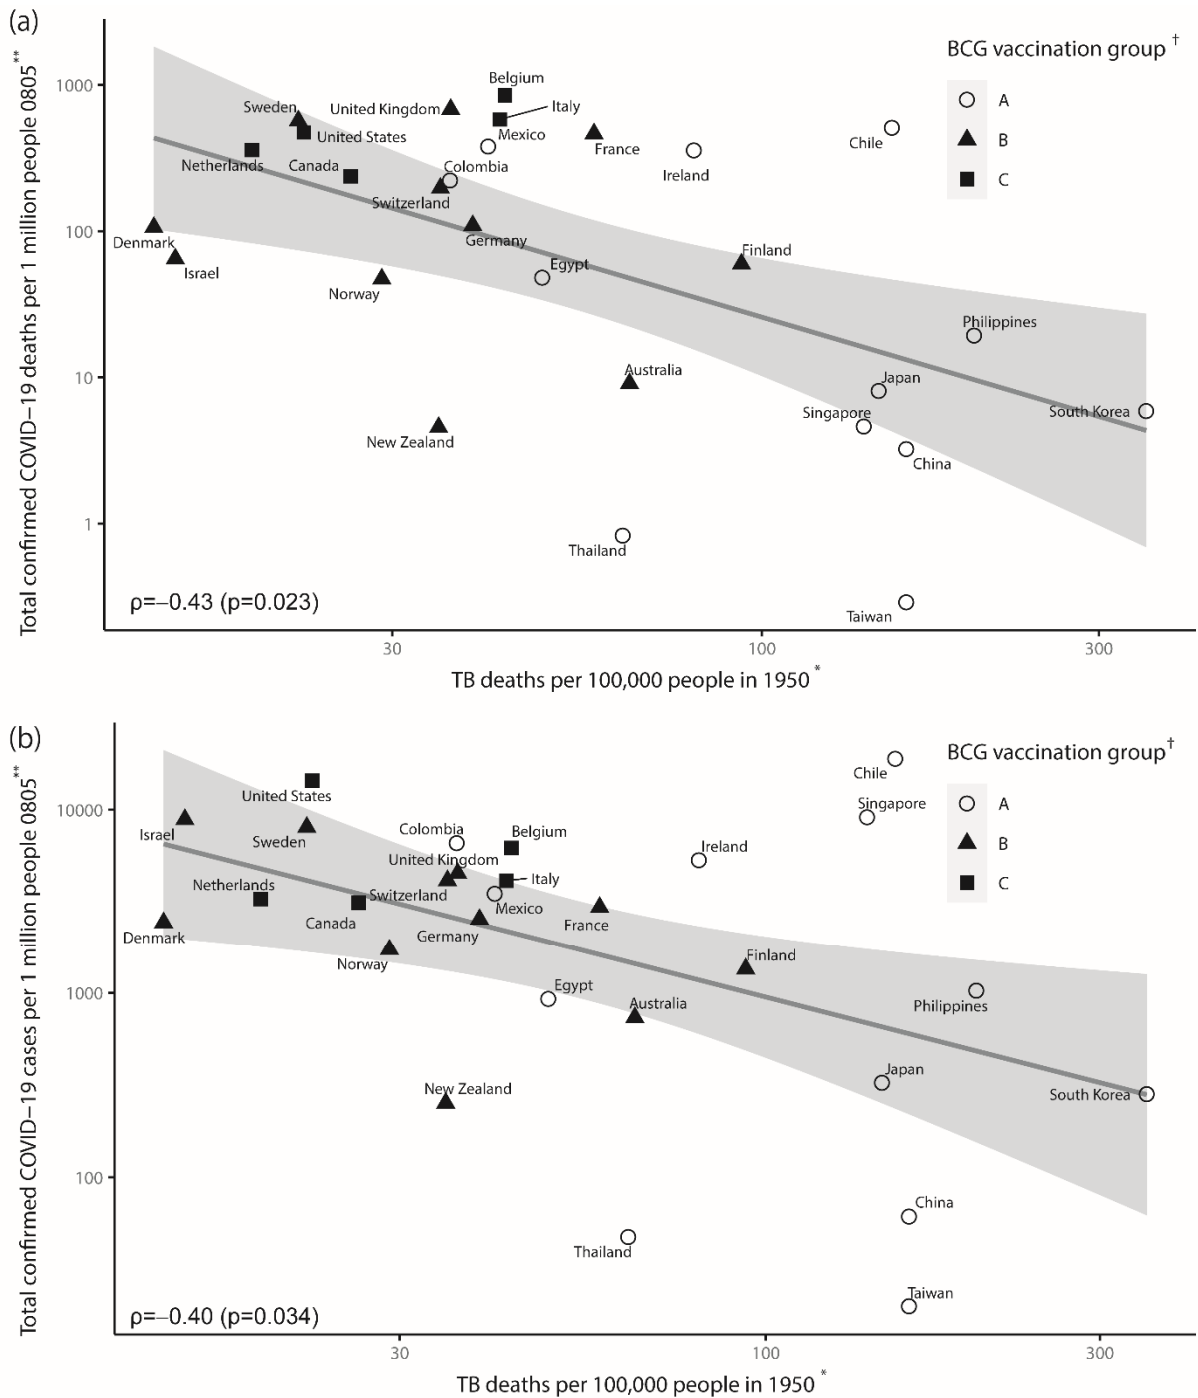

**S2 Fig. Scatterplot of the mortality rate of tuberculosis (TB) in 1950 versus (a) cumulative mortality rate of COVID-19 and (b) cumulative incidence rate of COVID-19 on 5 August 2020 according to BCG vaccination status among 28 countries**

\* Information was obtained from References [13-16]. The mortality rate of tuberculosis in China was substituted by that of Taiwan. Data of South Korea were estimated based on data collected in 1954 [17].

\*\* On 5 August 2020. Information was obtained from “Our World in Data” [1].

† Information was obtained from “the BCG World Atlas” [18]. A: The country currently has a universal BCG vaccination programme. B: The country used to recommend BCG vaccination for everyone, but currently, it does not. C: The country never had universal BCG vaccination programmes. Norway was moved from groups A to B [19]. TB, tuberculosis.
